# Supplementary material
Source: publisher site journal article supplement (https://static.cambridge.org/content/id/urn:cambridge.org:id:article:S1041610220000733/resource/name/S1041610220000733supp001.docx)

## **Supplementary Figure 1: Prisma Flow Diagram**


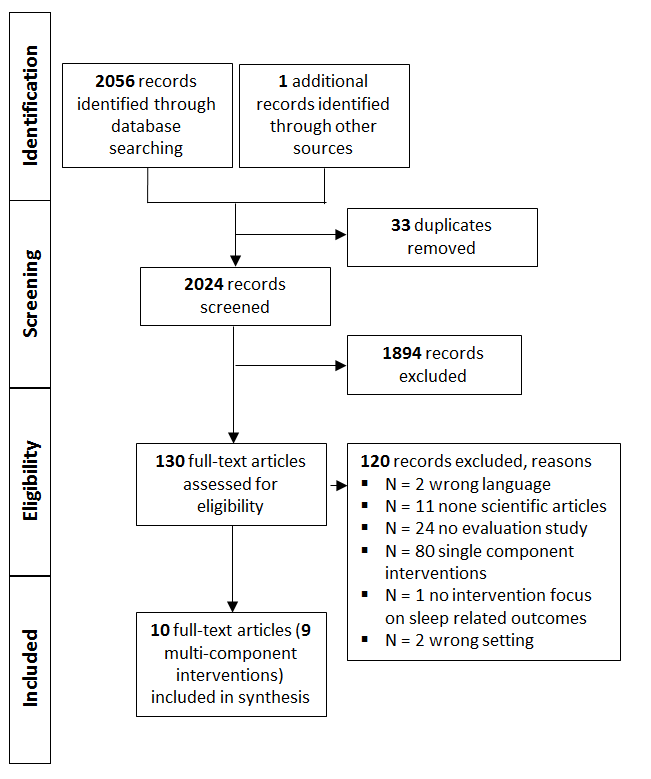

Supplement: Supplementary file 1 [file S1041610220000733supp001.docx]
